# Supplementary material
Source: MDPI journal article supplement (https://www.mdpi.com/2073-4352/12/1/51)
Supplement: s1 [file s1]

## Supplementary Materials

Interfacial Stabilities, Electronic Properties and Interfacial Fracture Mechanism of 6H-SiC Reinforced Copper Matrix studied by the First Principles Method

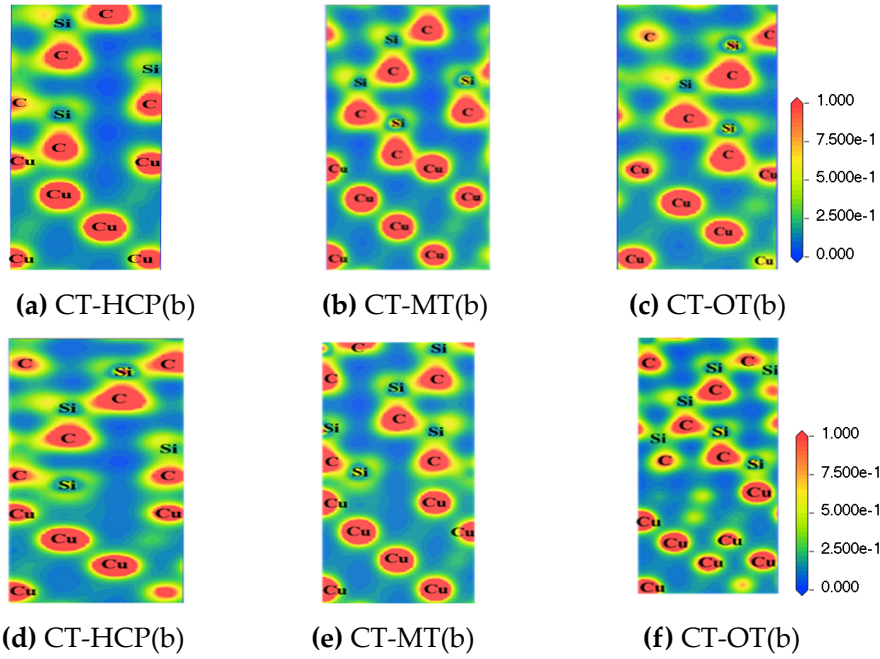

**Figure S1.** The charge density distribution of the interfacial atoms of all "(b)" type of 6H-SiC(0001)/Cu(111) interfacial models along (211) interfaces ( $\text{eV}/\text{\AA}^3$ )

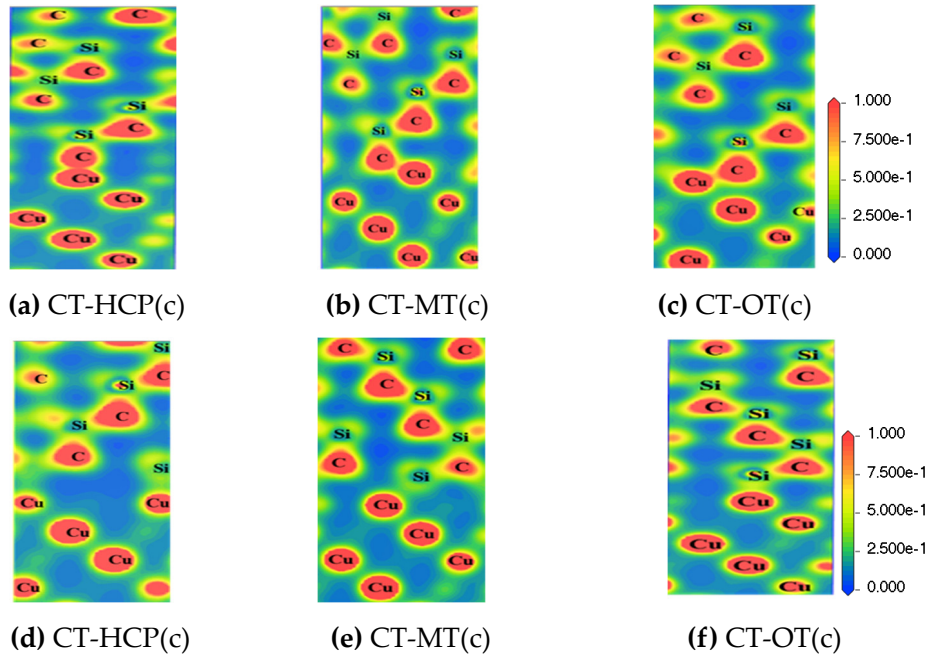

**Figure S2.** The charge density distribution of the interfacial atoms of all "(c)" type of 6H-SiC(0001)/Cu(111) interfacial models along (211) interfaces ( $\text{eV}/\text{\AA}^3$ )

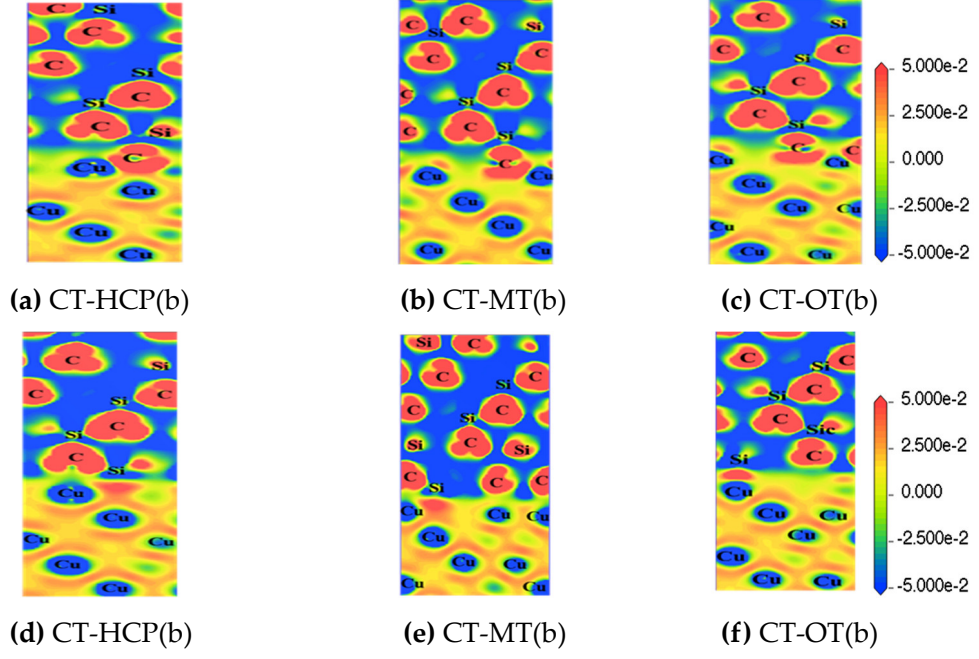

**Figure S3.** The charge density difference of the interfacial atoms of all “(b)” type of 6H-SiC(0001)/Cu(111) interfacial models along (211) interface ( $\text{eV}/\text{\AA}^3$ ).

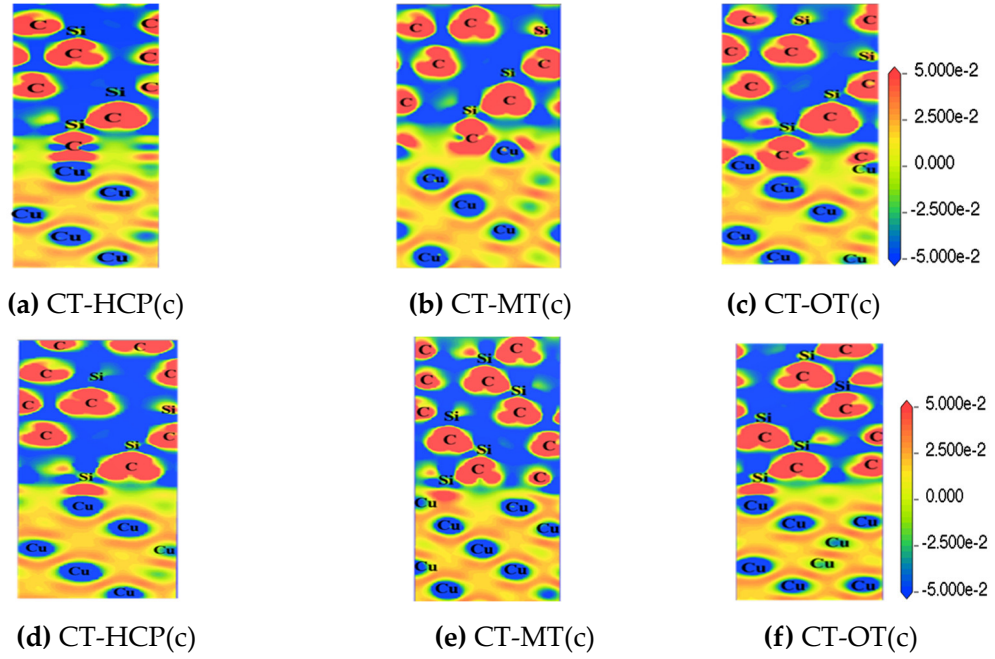

**Figure S4.** The charge density difference of the interfacial atoms of all “(c)” type of 6H-SiC(0001)/Cu(111) interfacial models along (211) interface ( $\text{eV}/\text{\AA}^3$ ).

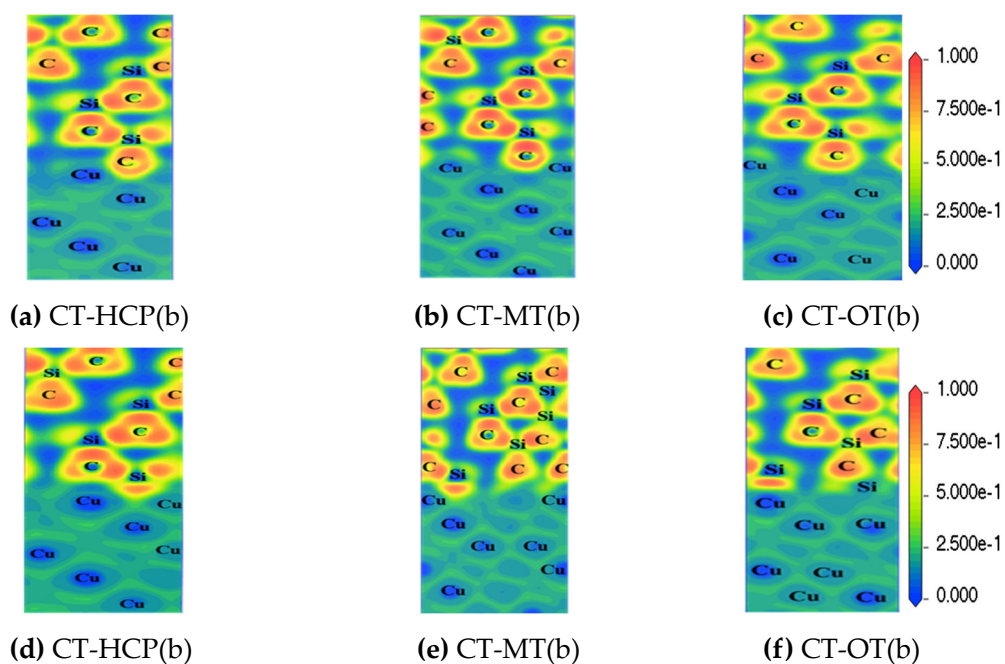

**Figure S5.** The electron localization function of the interfacial atoms of all “(b)” type of 6H-SiC(0001)/Cu(111) interfacial models along (211) interface ( $\text{eV}/\text{\AA}^3$ ).

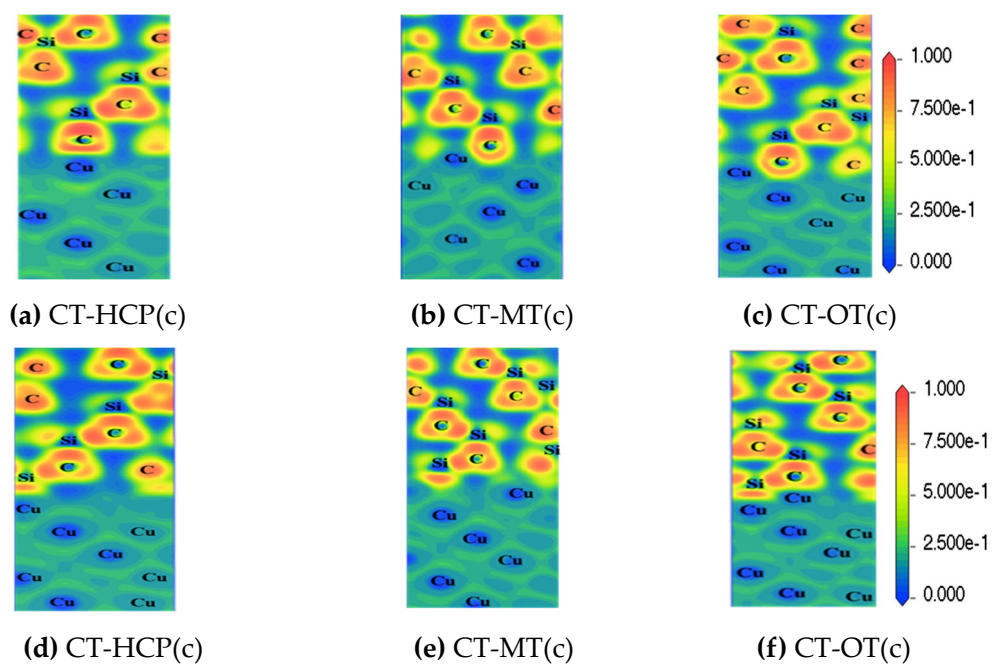

**Figure S6.** The electron localization function of the interfacial atoms of all “(c)” type of 6H-SiC(0001)/Cu(111) interfacial models along (211) interface ( $\text{eV}/\text{\AA}^3$ ).



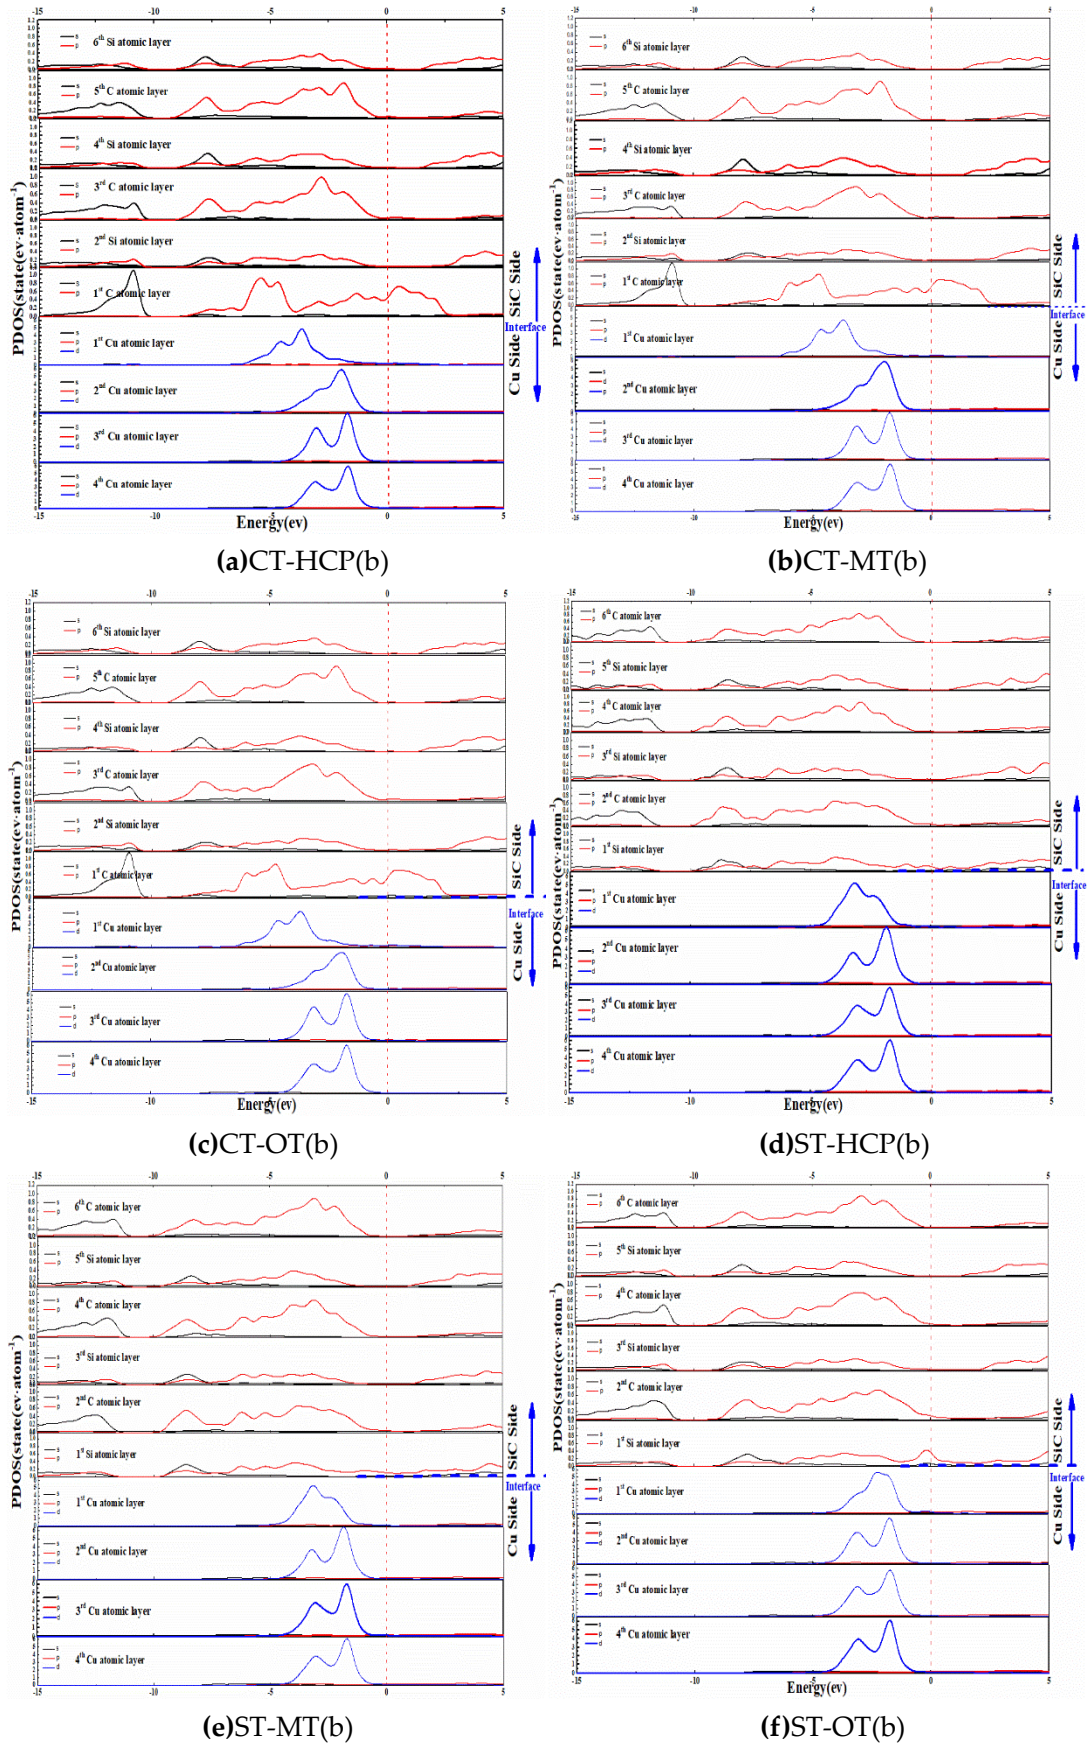

**Figure S7.** The partial density of state of the interfacial atoms of all “(b)” type of 6H-SiC(0001)/Cu(111) interfacial models.

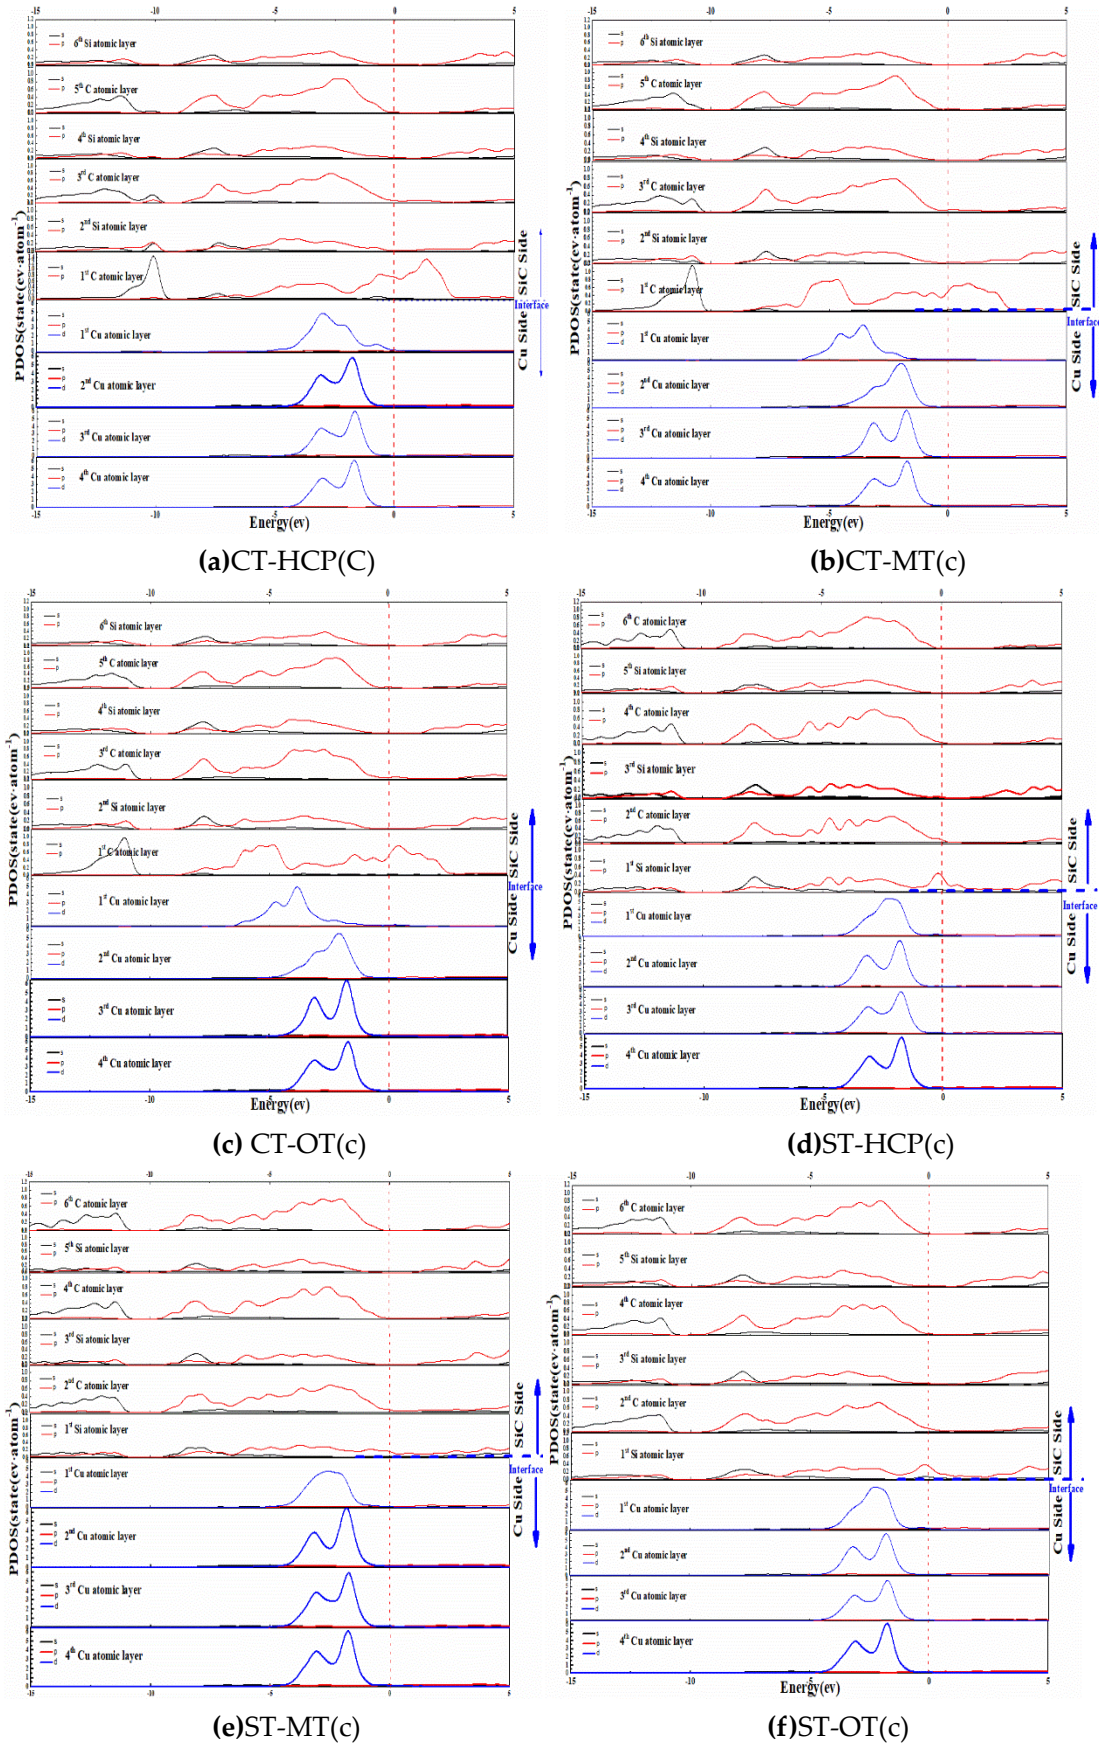

**Figure S8.** The partial density of state of the interfacial atoms of all “(c)” type of 6H-SiC(0001)/Cu(111) interfacial models.
